# Supplementary material
Source: Springer Nature journal article supplement (https://www.springermedizin.de/resource/supplementary/12936_2014_3344_MOESM9_ESM.pdf/9545686)

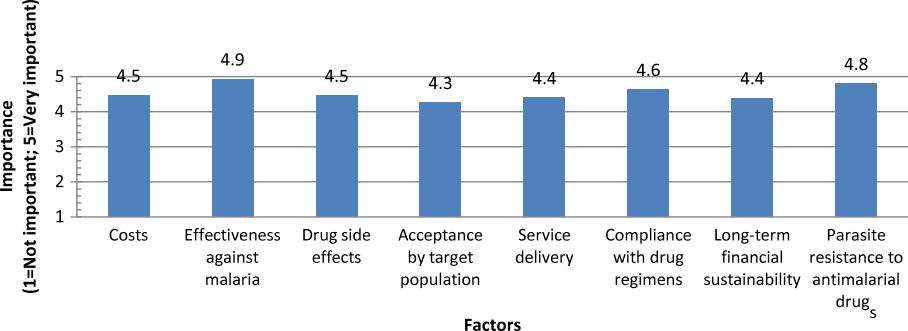

Supplement: MOESM9 [file 9545686]
